# Supplementary material for: Impact of the Coronavirus Disease Pandemic on Health-Related Quality of Life of Patients with Inflammatory Bowel Disease
Source: Springer Nature journal article supplement (doi:10.1007/s10620-021-07118-8), 2021-06-28
Supplement: MOESM1 [file 19299362]

Supplementary Table 1A. Estimates and 95% confidence intervals for the transformed IBDQ score from the model including time.

|  | **Estimate** | **2,5%** | **97.5%** |
| --- | --- | --- | --- |
| (Intercept) | 6.514 | 6.358 | 6.670 |
| Time | 0.006 | -0.003 | 0.015 |

Supplementary Table 1A. Expected values of the IBDQ score (original scale) per time point and corresponding 95% confidence interval.

| **Time (week)** | **Score** | **2.5%** | **97.5%** |
| --- | --- | --- | --- |
| 0 | 182.568 | 180.440 | 184.479 |
| 2 | 182.407 | 180.312 | 184.352 |
| 6 | 182.086 | 179.905 | 184.080 |
| 12 | 181.602 | 179.089 | 184.099 |
