# Supplementary material for: Impact of the Coronavirus Disease Pandemic on Health-Related Quality of Life of Patients with Inflammatory Bowel Disease
Source: Springer Nature journal article supplement (doi:10.1007/s10620-021-07118-8), 2021-06-28
Supplement: MOESM3 [file 19299362]

Supplementary Table 3A. Estimates and 95% confidence intervals for the transformed IBD-control-8 total score from the model including time.

|  |  |  | **95% CI of exp(coefficient)** | |
| --- | --- | --- | --- | --- |
|  | **Coefficient** | **exp(coefficient)** | **2.5%** | **97.5%** |
| (Intercept) | 1.651 | 5.213 | 4.842 | 5.612 |
| Time | 0.004 | 1.004 | 0.998 | 1.011 |

Supplementary Table 3B. Expected values of the IBD-control-8 score (original scale) per time point and corresponding 95% confidence interval.

| **Time (weeks)** | **Score** | **2.5%** | **97.5%** |
| --- | --- | --- | --- |
| 0 | 11.787 | 11.388 | 12.158 |
| 6 | 11.658 | 11.270 | 12.020 |
| 12 | 11.526 | 11.033 | 11.978 |
